# Supplementary material for: A facile and scalable fabrication method of scrolled graphene/boron nitride-based van der Waals superlattice heterostructure materials for highly stable supercapacitor electrode application
Source: Royal Society of Chemistry journal article supplement (doi:10.1039/d4nr01289e), 2024-01-01
Supplement: d4nr01289e1.pdf [file d4nr01289e1.pdf]

## Supporting information

# **Facile and Scalable Fabrication Method of Scrolled Graphene/Boron Nitride-based Van der Waals Superlattices Heterostructure Materials for Highly Stable Supercapacitor Electrode Application**

Ok-Kyung Park <sup>a</sup>, Nam Hoon Kim<sup>a\*</sup>, Joong Hee Lee <sup>a,b\*</sup>

<sup>a</sup> Department of Nano Convergence Engineering, Jeonbuk National University, Jeonju, Jeonbuk, 54896, Republic of Korea

<sup>b</sup> Carbon Composite Research Center, Department of Polymer-Nano Science and Technology, Jeonbuk National University, Jeonju, Jeonbuk, 54896, Republic of Korea

**Table S1.** Atomic content of GO, O-BN, G/BN, G/Fe/BN, and G/Fe/BN(NS) as determined by XPS (in at %).

| Sample      | Atomic content (%) |      |       |       |      |
|-------------|--------------------|------|-------|-------|------|
|             | C                  | B    | N     | O     | Fe   |
| O-BN        | 10.34              | 45.4 | 39.43 | 4.83  | N/A  |
| GO          | 77.29              | N/A  | 4.64  | 17.89 | N/A  |
| G/BN        | 60.56              | 8.72 | 4.26  | 26.47 | N/A  |
| G/Fe/BN     | 59.40              | 3.87 | 7.67  | 28.00 | N/A  |
| G/Fe/BN(NS) | 57.03              | 5.80 | 8.96  | 28.14 | 0.07 |

\*N/A: Not available

**Table S2.** Specific mass capacitance ( $C_m$ ) and specific volume capacitance ( $C_v$ ) of GO, G/Fe/BN, and G/Fe/BN(NS) with various current density.

| Current density ( $A \cdot g^{-1}$ ) | Specific mass capacitance ( $F \cdot g^{-1}$ ) |         |             | Specific volume capacitance ( $F \cdot cm^{-3}$ ) |         |             |
|--------------------------------------|------------------------------------------------|---------|-------------|---------------------------------------------------|---------|-------------|
|                                      | GO                                             | G/Fe/BN | G/Fe/BN(NS) | GO                                                | G/Fe/BN | G/Fe/BN(NS) |
| 0.5                                  | 53                                             | 129     | 207         | 23.69                                             | 51.73   | 83.01       |
| 1.0                                  | 41                                             | 93      | 189         | 18.33                                             | 37.29   | 75.79       |
| 2.0                                  | 36                                             | 84      | 171         | 16.09                                             | 33.68   | 68.57       |
| 3.0                                  | 33                                             | 72      | 162         | 14.75                                             | 28.87   | 64.96       |
| 4.0                                  | 32                                             | 66      | 156         | 14.31                                             | 26.47   | 62.55       |
| 5.0                                  | 30                                             | 59      | 153         | 13.41                                             | 23.66   | 61.53       |

The specific volume capacitance ( $C_v$ ) was calculated according to the following equation<sup>1</sup>:

$$C_v = C_m \times \rho$$

Where  $C_m$  is the specific mass capacitance and  $\rho$  is density of electrode.

(1) J. Zhou, J. Lian, L. Hou, J. Zhang, H. Gou, M. Xia, Y. Zhao, T.A. Stobel, L. Tao, F. Gao, *Nat. Commun.*, 2015, **6**, 8503.

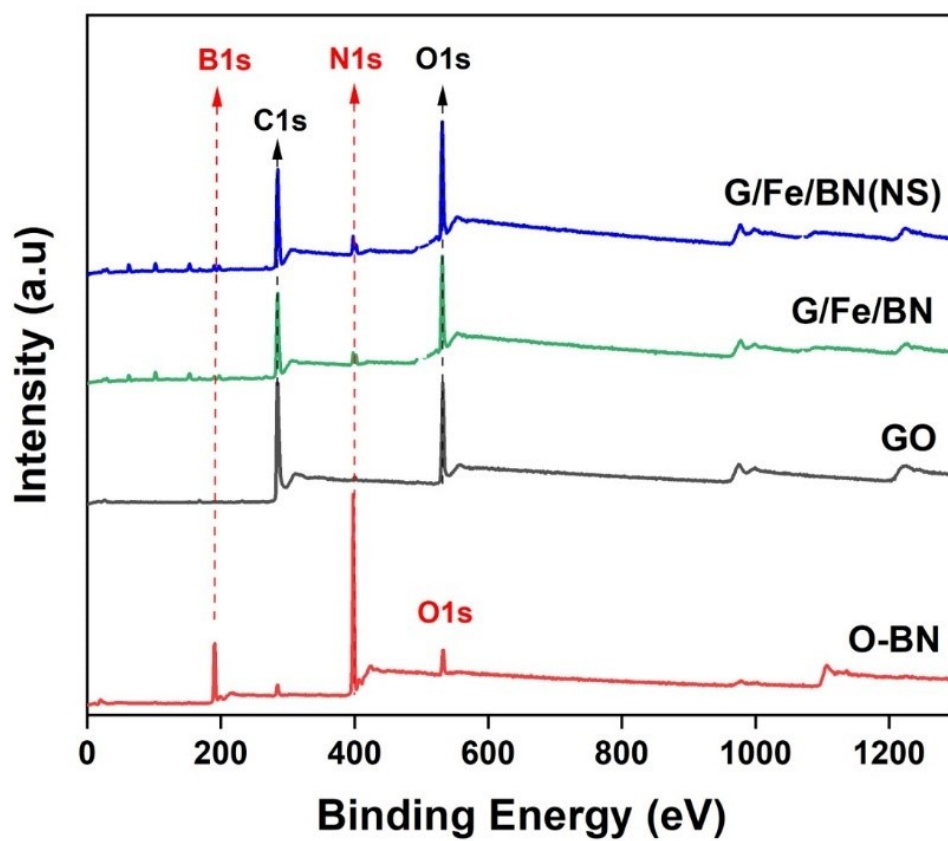

Fig. S1 XPS survey spectra of the O-BN, GO, G/Fe/BN, and G/Fe/BN(NS)

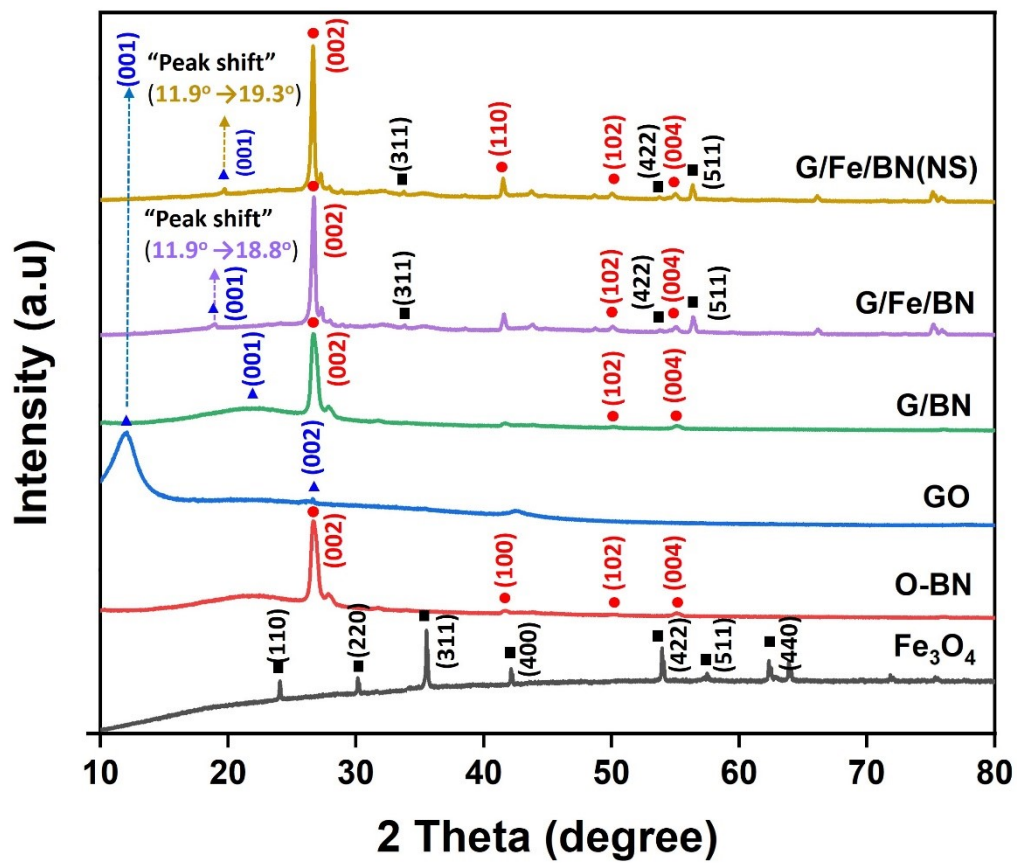

Fig. S2 XRD pattern of Fe<sub>3</sub>O<sub>4</sub>, O-BN, GO, G/BN, G/Fe/BN, and G/Fe/BN(NS).

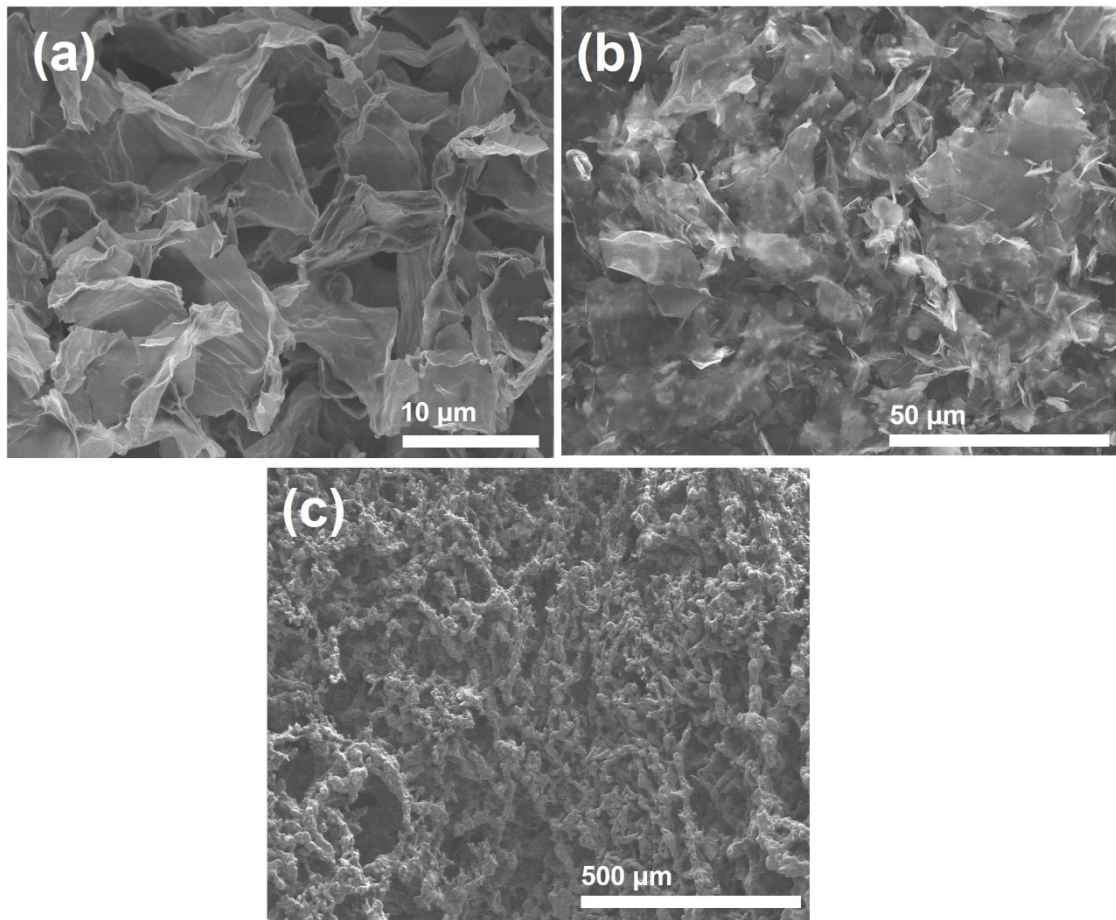

**Fig. S3** The FE-SEM image of (a) G/BN, (b) G/Fe/BN, and (c) G/Fe/BN(NS).

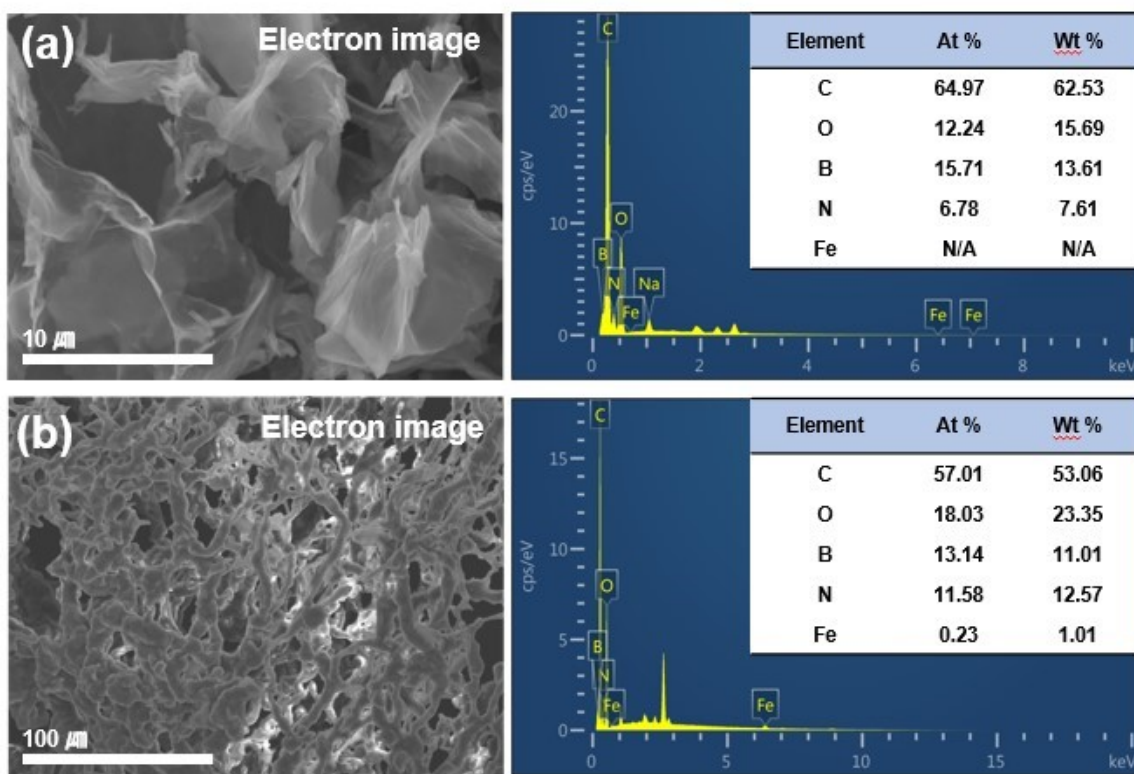

**Fig. S4** The FE-SEM image and EDX spectrum of (a) G/Fe/BN and (b) G/Fe/BN(NS). Inserted table exhibits the quantification results of detected atoms of carbon (C), oxygen (O), boron (B), nitrogen (N), and iron (Fe).

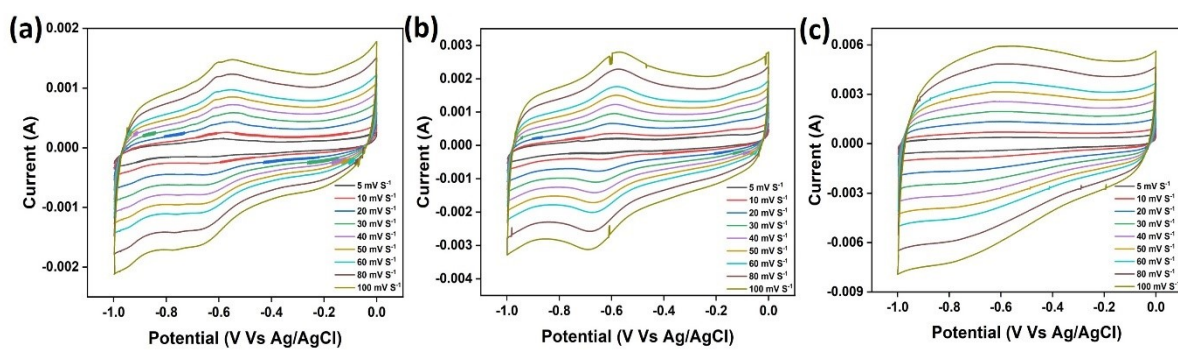

**Fig. S5** CV plot with scan rate increasing from  $5 \text{ mV S}^{-1}$  to  $100 \text{ mV S}^{-1}$ : (a) GO, (b) G/Fe/BN, and (c) G/Fe/BN(NS).

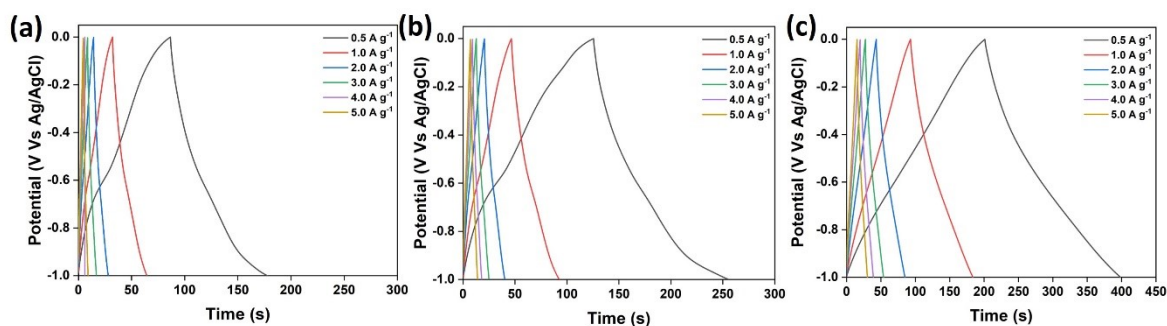

**Fig. S6** GCD curve with current density increasing from  $0.5 \text{ A g}^{-1}$  to  $5.0 \text{ A g}^{-1}$ : (a) GO, (b) G/Fe/BN, and (c) G/Fe/BN(NS).
